# Supplementary material
Source: publisher figshare collection journal article supplement (https://tandf.figshare.com/ndownloader/files/23102015)
Supplement: Supplementary file 1 [file 23102015]

External Oxidant-free Electrooxidative Intramolecular S-N Bond Formation for One-pot Synthesis for 3,5-Disubstituted 1,2,4-thiadiazoles

Qihao Zhong, Shouri Sheng and Junmin Chen*

Key Laboratory of Functional Small Organic Molecules, Ministry of Education, College of Chemistry and Chemical Engineering, Jiangxi Normal University, Nanchang, Jiangxi 330022, China

E-mail:junminchen@jxnu.edu.cn

**Supplemental Materials**

**1. General information**

Unless otherwise noted, all reagents, and solvents were purchased from commercial suppliers and used without further purification. The reactions were carried out under air. The instrument for electrolysis is dual display potentiostat (DJS-292B) (made in China). The anodic electrode was graphite rod (ϕ 6 mm) and cathodic electrode was platinum plate (15 mm×15 mm×0.3 mm). Thin layer chromatography (TLC) employed glass 0.25 mm silica gel plates. Flash chromatography columns were packed with 200-300 mesh silica gel in petroleum (bp. 60-90 oC). 1H and 13C NMR data were recorded with Bruker Advance III (400 MHz) spectrometers with tetramethylsilane as an internal standard. All chemical shifts (δ) are reported in ppm and coupling constants (J) in Hz. and DMSO (2.50 ppm for 1 H NMR, 39.50 ppm for 13C NMR). Melting point were determined using X-4 made by Peking Taike Apparatus Co. Ltd. High resolution mass spectra (HRMS) were measured with a Waters Micromass GCT instrument.

**2. Experimental procedure**

**General procedure for one-pot synthesis for 3,5-disubstituted 1,2,4-thiadiazoles**

In an oven-dried undivided three-necked bottle (25 mL) equipped with a stir bar, amidine or guanidines hydrochloride **1** (0.3 mmol), isothiocyanate **2** (0.33 mmol), NEt3 (0.6 mmol), and CH3CN (6 mL) were added and stirred at room temperature until the reaction was complete. The resulted imidoyl thiourea **3** was obtained without the isolation. Subsequently, the three-necked bottle was equipped with graphite rod (ϕ 6 mm, about 15 mm immersion depth in solution) as the anode and platinum plate (15 mm×15 mm×0.3 mm) as the cathode, n-Bu4NI (0.3 mmol, 0.05 M) was added. Then the electrolysis system was stirred at a constant current of 20 mA at room temperature for 3h. When the reaction finished, the reaction mixture was washed with water and extracted with ethyl acetate (10 mL x 3). The organic layers were combined, dried over Na2SO4. The solvent was removed under reduced pressure, and the crude product was purified by column chromatography on silica gel to give pure products.

**3. Characterization for Compounds 4 and 5**

**Phenyl-(3-phenyl-[1,2,4]thiadiazol-5-amine1 (4a)**. The product was obtained as a white solid in 98% yield (74.4 mg); 1H NMR (400 MHz, DMSO-*d*6) :δ 11.05 (s, 1H), 8.20 (d, *J* = 7.5 Hz, 2H), 7.67 (d, *J* = 8.2 Hz, 2H), 7.52 (d, *J* = 6.9 Hz, 3H), 7.45 (t, *J* = 7.9 Hz, 2H), 7.11 (t, *J* = 7.4 Hz, 1H).

**3-phenyl-N-(p-tolyl)-1,2,4-thiadiazol-5-amine1 (4b)**. The product was obtained as a white solid in 96% yield (76.9 mg); 1H NMR (400 MHz, DMSO-*d*6): δ 10.96 (s, 1H), 8.19 (d, *J* = 7.8 Hz, 2H), 7.53 (d, *J* = 3.3 Hz, 2H), 7.51 (t, *J* = 3.1 Hz, 3H), 7.24 (d, *J* = 8.2 Hz, 2H), 2.30 (s, 3H).

**N-(4-methoxyphenyl)-3-phenyl-1,2,4-thiadiazol-5-amine1 (4c)**. The product was obtained as a white solid in 97% yield (89.9 mg); 1H NMR (400 MHz, DMSO-*d*6): δ 10.88 (s, 1H), 8.20 (d, *J* = 7.9 Hz, 2H), 7.58 (d, *J* = 8.9 Hz, 2H), 7.55 – 7.48 (m, 3H), 7.03 (d, *J* = 9.0 Hz, 2H), 3.77 (s, 3H).

**N-(4-fluorophenyl)-3-phenyl-1,2,4-thiadiazol-5-amine1 (4d)**. The product was obtained as a white solid in 96% yield (78.1 mg); 1H NMR (400 MHz, DMSO-*d*6): δ 11.04 (s, 1H), 8.23 – 8.16 (m, 2H), 7.72 (dd, *J* = 8.9, 4.7 Hz, 2H), 7.52 (d, *J* = 6.3 Hz, 3H), 7.28 (t, *J* = 8.8 Hz, 2H).

**N-(4-chlorophenyl)-3-phenyl-1,2,4-thiadiazol-5-amine1 (4e)**.The product was obtained as a white solid in 97% yield (83.8 mg); 1H NMR (400 MHz, DMSO-*d*6): δ 11.14 (s, 1H), 8.20 (s, 2H), 7.73 (d, *J* = 8.6 Hz, 2H), 7.58-7.51 (m, 3H), 7.49 (d, *J* = 8.8 Hz, 2H).

**N-(4-bromophenyl)-3-phenyl-1,2,4-thiadiazol-5-amine2 (4f).** The product was obtained as a white solid in 92% yield (91.4 mg); 1H NMR (400 MHz, DMSO-*d*6): δ 11.06 (s, 1H), 8.29 – 8.14 (m, 2H), 7.68 (d, *J* = 8.0 Hz, 2H), 7.53 (q, *J* = 5.4 Hz, 3H), 7.45 (t, *J* = 7.9 Hz, 2H), 7.12 (t, *J* = 7.3 Hz, 1H).

**N-(4-iodophenyl)-3-phenyl-1,2,4-thiadiazol-5-amine1 (4g).** The product was obtained as a white solid in 94% yield (106.9 mg); 1H NMR (400 MHz, DMSO-*d*6) :δ 11.11 (s, 1H), 8.23-8.15 (m, 2H), 7.75 (d, *J* = 8.6 Hz, 2H), 7.54 (s, 2H), 7.52-7.47 (m, 3H).

**3-phenyl-N-(m-tolyl)-1,2,4-thiadiazol-5-amine1 (4h).** The product was obtained as a white solid in 95% yield (76.1 mg); 1H NMR (400 MHz, DMSO-*d*6) : δ 10.99 (s, 1H), 8.19 (dd, *J* = 7.7, 1.8 Hz, 2H), 7.56-7.47 (m, 4H), 7.40 (s, 1H), 7.32 (t, *J* = 7.8 Hz, 1H), 6.93 (d, *J* = 7.5 Hz, 1H), 2.36 (s, 3H).

**N-(3-chlorophenyl)-3-phenyl-1,2,4-thiadiazol-5-amine3 (4i).** The product was obtained as a white solid in 92% yield (79.2 mg); 1H NMR (400 MHz, DMSO-*d*6) : δ 11.19 (s, 1H), 8.23-8.15 (m, 2H), 7.87 (s, 1H), 7.59 (d, *J* = 8.2 Hz, 1H), 7.54 (d, *J* = 7.0 Hz, 3H), 7.46 (t, *J* = 8.1 Hz, 1H), 7.15 (d, *J* = 7.6 Hz, 1H).

**3-phenyl-N-(o-tolyl)-1,2,4-thiadiazol-5-amine (4j). 1** The product was obtained as a white solid in 89% yield (71.3 mg); 1H NMR (400 MHz, DMSO-*d*6): δ 10.24 (s, 1H), 8.24-8.08 (m, 2H), 7.97 (d, *J* = 8.0 Hz, 1H), 7.50 (d, *J* = 6.6 Hz, 3H), 7.30 (d, *J* = 7.4 Hz, 2H), 7.13 (t, *J* = 7.4 Hz, 1H), 2.33 (s, 3H).

**N-phenyl-3-(p-tolyl)-1,2,4-thiadiazol-5-amine4 (4k).** The product was obtained as a white solid in 97% yield (77.7 mg); 1H NMR (400 MHz, DMSO-*d*6): δ 11.03 (s, 1H), 8.08 (d, *J* = 8.1 Hz, 2H), 7.66 (d, *J* = 8.1 Hz, 2H), 7.43 (t, *J* = 7.9 Hz, 2H), 7.31 (d, *J* = 8.0 Hz, 2H), 7.09 (t, *J* = 7.3 Hz, 1H), 2.36 (s, 3H).

**3-(4-methoxyphenyl)-N-phenyl-1,2,4-thiadiazol-5-amine5 (4l).** The product was obtained as a white solid in 91% yield (77.3 mg); 1H NMR (400 MHz, DMSO-*d*6): δ 11.01 (s, 1H), 8.13 (d, *J* = 8.8 Hz, 2H), 7.65 (d, *J* = 8.1 Hz, 2H), 7.43 (t, *J* = 7.9 Hz, 2H), 7.08 (dd, *J* = 16.5, 8.1 Hz, 3H), 3.82 (s, 3H).

**3-(4-fluorophenyl)-N-phenyl-1,2,4-thiadiazol-5-amine5 (4m).** The product was obtained as a white solid in 88% yield (71.5 mg); 1H NMR (400 MHz, DMSO-*d*6): δ 11.05 (s, 1H), 8.22 (dd, *J* = 8.6, 5.7 Hz, 2H), 7.65 (d, *J* = 7.9 Hz, 2H), 7.43 (t, *J* = 7.8 Hz, 2H), 7.34 (t, *J* = 8.8 Hz, 2H), 7.10 (t, *J* = 7.3 Hz, 1H).

**3-(4-chlorophenyl)-N-phenyl-1,2,4-thiadiazol-5-amine5 (4n).** The product was obtained as a white solid in 91% yield (78.4 mg); 1H NMR (400 MHz, DMSO-*d*6): δ 11.08 (s, 1H), 8.19 (d, *J* = 8.5 Hz, 2H), 7.66 (d, *J* = 8.0 Hz, 2H), 7.62-7.56 (m, 2H), 7.47-7.41 (m, 2H), 7.11 (t, *J* = 7.7 Hz, 1H).

**3-(4-bromophenyl)-N-phenyl-1,2,4-thiadiazol-5-amine5 (4o).** The product was obtained as a white solid in 89% yield (88.4 mg); 1H NMR (400 MHz, DMSO-*d*6) ：δ 11.08 (s, 1H), 8.11 (d, *J* = 8.5 Hz, 2H), 7.73 (d, *J* = 8.5 Hz, 2H), 7.65 (d, *J* = 7.9 Hz, 2H), 7.44 (t, *J* = 7.9 Hz, 2H), 7.11 (t, *J* = 7.4 Hz, 1H).

**N,3-di-p-tolyl-1,2,4-thiadiazol-5-amine3 (4p).** The product was obtained as a white solid in 98% yield (68.3 mg); 1H NMR (400 MHz, DMSO-*d*6)：δ 10.95 (s, 1H), 8.06 (d, *J* = 8.1 Hz, 2H), 7.51 (d, *J* = 8.3 Hz, 2H), 7.31 (d, *J* = 8.0 Hz, 2H), 7.23 (d, *J* = 8.3 Hz, 2H), 2.37 (s, 3H), 2.29 (s, 3H).

**3-(4-methoxyphenyl)-N-(p-tolyl)-1,2,4-thiadiazol-5-amine4 (4q).** The product was obtained as a white solid in 96% yield (85.5 mg); 1H NMR (400 MHz, DMSO-*d*6)：δ 10.92 (s, 1H), 8.11 (d, *J* = 8.8 Hz, 2H), 7.49 (s, 2H), 7.23 (d, *J* = 8.3 Hz, 2H), 7.06 (d, *J* = 8.9 Hz, 2H), 3.82 (s, 3H), 2.29 (s, 3H).

**3-phenyl-N-(pyridin-4-yl)-1,2,4-thiadiazol-5-amine3 (4r).** The product was obtained as a white solid in 87% yield (66.3 mg); 1H NMR (400 MHz, DMSO-*d*6): δ 11.17 (s, 1H), 8.78 (s, 2H), 8.08 (d, *J* = 5.2 Hz, 2H), 7.69 (d, *J* = 8.1 Hz, 2H), 7.46 (t, *J* = 7.8 Hz, 2H), 7.14 (t, *J* = 7.3 Hz, 1H).

**N-isopropyl-3-phenyl-1,2,4-thiadiazol-5-amine6 (4s).** The product was obtained as a white solid in 92% yield (66.4 mg); 1H NMR (400 MHz, DMSO-*d*6) :δ 8.49 (d, *J* = 7.3 Hz, 1H), 8.16 – 8.07 (m, 2H), 7.51-7.43 (m, 3H), 1.26 (d, *J* = 6.5 Hz, 6H).

**N-isopropyl-3-(p-tolyl)-1,2,4-thiadiazol-5-amine4 (4t).** The product was obtained as a white solid in 93% yield (65.0 mg); 1H NMR (400 MHz, DMSO-*d*6): δ 8.42 (d, *J* = 6.4 Hz, 1H), 8.02 (d, *J* = 8.9 Hz, 2H), 7.00 (d, *J* = 8.9 Hz, 2H), 3.81 (s, 4H), 1.24 (d, *J* = 6.5 Hz, 6H).

**3-(4-bromophenyl)-N-isopropyl-1,2,4-thiadiazol-5-amine6 (4u).** The product was obtained as a white solid in 88% yield (78.4mg); 1H NMR (400 MHz, DMSO-*d*6)：δ 8.53 (s, 1H), 8.03 (d, *J* = 8.5 Hz, 2H), 7.67 (d, *J* = 8.5 Hz, 2H), 3.84 (s, 1H), 1.26 (d, *J* = 6.5 Hz, 6H).

**3-cyclopropyl-N-phenyl-1,2,4-thiadiazol-5-amine (4v).** The product was obtained as a white solid in 87% yield (56.6 mg); mp 143-144 oC; 1H NMR (400 MHz, DMSO-*d*6): δ 10.86 (s, 1H), 7.49 (d, *J* = 7.8 Hz, 2H), 7.36 (t, *J* = 7.9 Hz, 2H), 7.04 (t, *J* = 7.3 Hz, 1H), 2.10 (tt, *J* = 8.0, 5.1 Hz, 1H), 0.98 (td, *J* = 7.8, 3.2 Hz, 4H)；13C NMR (100 MHz, DMSO-*d*6): δ 179.20, 140.42, 129.72, 123.09, 117.96, 14.04, 8.92. HRMS-ESI (m/z): [M + H]+ calcd for C11H12N3S, 218.0771; found, 218.0774.

**3-cyclopropyl-N-(m-tolyl)-1,2,4-thiadiazol-5-amine (4w).** The product was obtained as a white solid in 91% yield (63.1 mg); mp 128-129 oC;  1H NMR (400 MHz, DMSO-*d*6): δ 10.81 (s, 1H), 7.34-7.19 (m, 3H), 6.86 (d, *J* = 7.4 Hz, 1H), 2.30 (s, 3H), 2.16-2.05 (m, 1H), 1.02-0.91 (m, 4H); 13C NMR (100 MHz, DMSO-*d*6): δ 179.26, 174.64, 140.38, 139.09, 129.61, 123.94, 118.55, 115.10, 21.67, 14.02, 8.92. HRMS-ESI (m/z): [M + H]+ calcd for C12H14N3S, 232.0909; found, 232.0911.

**N-(3-chlorophenyl)-3-cyclopropyl-1,2,4-thiadiazol-5-amine (4x).** The product was obtained as a white solid in 87% yield (65.5 mg); mp 153-154 oC 1H NMR (400 MHz, DMSO-*d*6): δ 11.03 (s, 1H), 7.74 (s, 1H), 7.40 (dd, *J* = 3.7, 1.5 Hz, 2H), 7.15-7.04 (m, 1H), 2.19-2.09 (m, 1H), 1.04-0.96 (m, 4H); 13C NMR (100 MHz, DMSO-*d*6)：δ 178.75, 174.73, 141.66, 134.06, 131.31, 122.59, 117.46, 116.28, 14.04, 9.03. HRMS-ESI (m/z): [M + H]+ calcd for C11H11ClN3S, 252.0363; found, 252.0367.

**N-phenyl-3-(1H-pyrazol-1-yl)-1,2,4-thiadiazol-5-amine (5a).** The product was obtained as a white solid in 96% yield (70.0 mg); mp 206-207 oC; 1H NMR (400 MHz, DMSO-*d*6): δ 11.29 (s, 1H), 8.49 (d, *J* = 2.3 Hz, 1H), 7.86 – 7.81 (m, 1H), 7.61 (d, *J* = 7.9 Hz, 2H), 7.45 (t, *J* = 7.9 Hz, 2H), 7.14 (t, *J* = 7.4 Hz, 1H), 6.60-6.55 (m, 1H)；13C NMR (100 MHz, DMSO-*d*6)：δ 179.84, 158.06, 143.06, 139.73, 130.74, 129.94, 123.92, 118.53, 108.57. HRMS-ESI (m/z): [M + H]+ calcd for C11H10N5S, 244.0676 found, 244.0672.

**3-(1H-pyrazol-1-yl)-N-(p-tolyl)-1,2,4-thiadiazol-5-amine1 (5b).** The product was obtained as a white solid in 92% yield (70.9 mg); 1H NMR (400 MHz, DMSO-*d*6): δ 11.19 (s, 1H), 8.46 (s, 1H), 7.82 (s, 1H), 7.46 (d, *J* = 8.2 Hz, 2H), 7.23 (d, *J* = 8.1 Hz, 2H), 6.56 (s, 1H), 2.29 (s, 3H).

**N-(4-methoxyphenyl)-3-(1H-pyrazol-1-yl)-1,2,4-thiadiazol-5-amine (5c).** The product was obtained as a white solid in 94% yield (77.0 mg); mp 182-183 oC; 1H NMR (400 MHz, DMSO-*d*6): δ 11.08 (s, 1H), 8.45 (s, 1H), 7.82 (s, 1H), 7.51 (d, *J* = 8.7 Hz, 2H), 7.02 (d, *J* = 9.0 Hz, 2H), 6.56 (d, *J* = 1.7 Hz, 1H), 3.77 (s, 3H)； 13C NMR (100 MHz, DMSO-*d*6): δ 158.12, 156.21, 142.97, 133.04, 130.65, 120.69, 115.14, 108.49, 55.77. HRMS-ESI (m/z): [M + H]+ calcd for C12H12N5OS, 274.0781 found, 274.0787.

**N3,N5-diphenyl-1,2,4-thiadiazole-3,5-diamine6 (5d).** The product was obtained as a white solid in 95% yield (76.4 mg); 1H NMR (400 MHz, DMSO-*d*6): δ 10.75 (s, 1H), 9.76 (s, 1H), 7.76 (d, *J* = 7.8 Hz, 2H), 7.63 (d, *J* = 7.8 Hz, 2H), 7.39 (t, *J* = 7.9 Hz, 2H), 7.27 (t, *J* = 7.9 Hz, 2H), 7.07 (t, *J* = 7.4 Hz, 1H), 6.89 (t, *J* = 7.3 Hz, 1H).

**N3-phenyl-N5-(p-tolyl)-1,2,4-thiadiazole-3,5-diamine6 (5e).** The product was obtained as a white solid in 97% yield (82.7 mg); 1H NMR (400 MHz, DMSO-*d*6): δ 10.79- 10.57 (m, 1H), 9.82-9.60 (m, 1H), 7.75 (d, *J* = 7.8 Hz, 1H), 7.63 (d, *J* = 8.4 Hz, 1H), 7.53-7.46 (m, 2H), 7.39 (t, *J* = 7.9 Hz, 0H), 7.26 (t, *J* = 7.9 Hz, 2H), 7.19 (d, *J* = 8.3 Hz, 2H), 7.06 (d, *J* = 8.3 Hz, 1H), 6.89 (t, *J* = 7.3 Hz, 1H), 2.26 (d, *J* = 20.4 Hz, 3H).

**N5-(4-chlorophenyl)-N3-phenyl-1,2,4-thiadiazole-3,5-diamine (5f).** The product was obtained as a white solid in 96% yield (80.0 mg); mp 208-209 oC; 1H NMR (400 MHz, DMSO-*d*6) :δ 11.02-10.64 (m, 1H), 10.04-9.70 (m, 1H), 7.84-7.72 (m, 2H), 7.72- 7.59 (m, 2H), 7.48-7.36 (m, 2H), 7.35-7.22 (m, 2H), 7.08 (t, *J* = 7.3 Hz, 0H), 6.90 (t, *J* = 7.3 Hz, 1H); 13C NMR (100 MHz, DMSO-*d*6): δ 176.50, 162.63, 141.45, 140.40, 139.29, 129.67, 129.47, 129.02, 126.63, 121.03, 119.69, 118.80, 118.25, 117.36. HRMS-ESI (m/z): [M + H]+ calcd for C14H12ClN4S, 303.0490 found, 303.0487.

**4. Referenecs.**

[1] Mariappan, A.; Rajaguru, K.; Chola, N. M.; Muthusubramanian, S.; Bhuvanesh, N. Hypervalent Iodine(III) Mediated Synthesis of 3-Substituted 5-Amino-1,2,4-thiadiazoles through Intramolecular Oxidative S–N Bond Formation.*J. Org. Chem*., **2016**, *81*, 6573-6579. DOI:[10.1021/acs.joc.6b01199](https://doi.org/10.1021/acs.joc.6b01199)**.**

[2] Jatangi, N.; Tumula, N.; Radha, K. P.; Nakka,M. I2-Mediated Oxidative C–N and N–S Bond Formation in Water: A Metal-Free Synthesis of 4,5-Disubstituted/N-Fused 3-Amino-1,2,4-triazoles and 3-Substituted 5-Amino-1,2,4-thiadiazoles.  *J. Org. Chem.*, **2018**, *83*, 5715-5723. DOI: [10.1021/acs.joc.8b00753](https://doi.org/10.1021/acs.joc.8b00753).

[3] Yang, Z.; Cao, T.; Liu, S.; Li, A.; Liu, K.; Yang, T.; Zhou, C. Transition-metal-free S–N Bond Formation: Synthesis of 5-Amino-1,2,4-thiadiazoles from Isothiocyanates and Amidine. *New J. Chem.*, **2019**, *43*, 6465-6468. DOI: [10.1039/C9NJ01419E](https://doi.org/10.1039/C9NJ01419E).

[4] Wang, B.; Meng, Y.; Zhou, Y.; Ren, L.; Wu, J.; Yu, W.; Chang, J. Synthesis of 5-Amino and 3,5-Diamino Substituted 1,2,4-Thiadiazoles by I2-Mediated Oxidative N–S Bond Formation. *J. Org. Chem.*, **2017**, *82*, 5898-5903. DOI: 10.1021/acs.joc.6b01199.

[5] Chai, L.; Lai, Z.; Xia, Q.; Yuan, J.; Bian, Q.; Yu, M.; Zhang, W.; Xu ,Y.; Xu, H. One-pot Synthesis of 3-Aryl-5-amino-1,2,4-thiadiazoles from Imidates and Thioureas by I2-mediated Oxidative Construction of the N-S Bond. *Eur. J. Org. Chem*. **2018**, 4338-4344. DOI： [10.1002/ejoc.201800670](https://doi.org/10.1002/ejoc.201800670).

[6] Yu, W.; Huang, Y.; Li, J.; Tang, X.; Wu, W.; Jiang, H. Copper-Catalyzed Aerobic Oxidative [3+2] Annulation for the Synthesis of 5-Amino/Imino-Substituted 1,2,4-Thiadiazoles through C–N/N–S Bond Formation. *J. Org. Chem*., 2018, **83**, 9334-9343. DOI: [10.1021/acs.joc.8b01292](https://doi.org/10.1021/acs.joc.8b01292).

**Figure S 1**: 1H NMR of 4a

**Figure S 2**: 13C NMR of 4a

**Figure S 3**: 1H NMR of 4b

**Figure S 4**: 13C NMR of 4b

**Figure S 5**: 1H NMR of 4c

**Figure S 6**: 13C NMR of 4c

**Figure S 7**: 1H NMR of 4d

**Figure S 8**: 13C NMR of 4d

**Figure S 9**: 1H NMR of 4e

**Figure S 10**: 13C NMR of 4e

**Figure S 11**: 1H NMR of 4f

**Figure S 12**: 13C NMR of 4f

**Figure S 13**: 1H NMR of 4g

**Figure S 14**: 13C NMR of 4g

**Figure S 15**: 1H NMR of 4h

**Figure S 16**: 13C NMR of 4h

**Figure S 17**: 1H NMR of 4i

**Figure S 118**: 13C NMR of 4i

**Figure S 19**: 1H NMR of 4j

**Figure S 20**: 13C NMR of 4j

**Figure S 21**: 1H NMR of 4k

**Figure S 22**: 13C NMR of 4k

**Figure S 21**: 1H NMR of 4l

**Figure S 22**: 13C NMR of 4l

**Figure S 23**: 1H NMR of 4m

**Figure S 24**: 13C NMR of 4m

**Figure S 25**: 1H NMR of 4n

**Figure S 26**: 13C NMR of 4n

**Figure S 27**: 1H NMR of 4o

**Figure S 28**: 13C NMR of 4o

**Figure S 29**: 1H NMR of 4p

**Figure S 30**: 13C NMR of 4p

**Figure S 31**: 1H NMR of 4q

**Figure S 32**: 13C NMR of 4q

**Figure S 33**: 1H NMR of 4r

**Figure S 34**: 13C NMR of 4r

**Figure S 35**: 1H NMR of 4s

**Figure S 36**: 13C NMR of 4s

**Figure S 37**: 1H NMR of 4t

**Figure S 38**: 13C NMR of 4t

**Figure S 39**: 1H NMR of 4u

**Figure S 40**: 13C NMR of 4u

**Figure S 41**: 1H NMR of 4v

**Figure S 42**: 13C NMR of 4v

**Figure S 43**: 1H NMR of 4w

**Figure S 44**: 13C NMR of 4w

**Figure S 45**: 1H NMR of 4x

**Figure S 46**: 13C NMR of 4x

**Figure S 47**: 1H NMR of 5a

**Figure S 48**: 13C NMR of 5a

**Figure S 49**: 1H NMR of 5b

**Figure S 50**: 13C NMR of 5b

**Figure S 51**: 1H NMR of 5c

**Figure S 52**: 13C NMR of 5c

**Figure S 53**: 1H NMR of 5d

**Figure S 54**: 13C NMR of 5d

**Figure S 55**: 1H NMR of 5e

**Figure S 56**: 13C NMR of 5e

**Figure S 57**: 1H NMR of 5f

**Figure S 58**: 13C NMR of 5f
